# Supplementary material
Source: HighWire-hosted journal article supplement (https://bmjopenquality.bmj.com/highwire/filestream/135915/field_highwire_adjunct_files/1/ds2653.xls)
Supplement: ds2653.xls [file ds2653.xls]

## Sheet: dbc
	Value Stream Map for Diabetes Centre - Baseline State
											Dr Consultation [3]
	Total patients		473						Dr Consultation only
	Period of Time Motion Study		(20/7/11 - 27/7/11)									DBC Consultation Rm
	Sub		349									DBC Dr
	Pte		124								Pt seen b4 appt	n = 48 (18.6%)
	DR Consultation	NC	30								Pt seen after appt	n = 210 (81.4%)
	DR Consultation	FP	333
	Non-Doctor Consultation	FV	51
	Non-Doctor Consultation	RV	148
	Service Providers	Median Service Time		95th Percentile Service Time											Single ND Services [5]
	DR	10 mins		20.9 mins
	DFS	20 mins		30.67 mins					Dr Consultation + Single ND service only							DBC
	POD	20 mins		45.7 mins							Dr Consultation [4]					DBC Nurse/Allied Health Staff
	DNE	30 mins		60 mins											DFS	n = 10 (12.2%)
	FUNDO	5 mins		10 mins								DBC Consultation Rm			POD	n = 13 (15.9%)
	DIET	30 mins		55.6 mins								DBC Dr			DNE	n = 17 (20.7%)
											Pt seen b4 appt	21 (25.6%)			FUNDO	n = 28 (34.1%)
											Pt seen after appt	61 (74.4%)			DIET	n = 14 (17.1%)
															Multiple ND Services [7]
																					DBC
									Dr Consultation + Multiple ND services only												DBC Nurse/Allied Health Staff							Re-appt/Cashier [10]
					Blood test [2]						Dr Consultation [6]				POD			DIET			n = 1 (4.3%)
		Registration + Parameters-taking [1]													POD			DNE			n = 2 (8.7%)								Cashier counter
						SOC Lab						DBC Consultation Rm			DIET			DNE			n = 5 (21.7%)								PCA
			Registration			Phlebotomist						DBC Dr			DIET			DFS			n = 2 (8.7%)							ST:	3 mins
			PCA/PSA		Performed before appt = 232						Pt seen b4 appt	5 (21.7%)			FUNDO			DNE			n = 2 (8.1%)
		ST:	3 mins		Performed on appt day itself = 55						Pt seen after appt	18 (78.3%)			FUNDO			DIET			n = 1 (4.3%)
					Not performed = 97										FUNDO			DFS			n = 6 (26.1%)
															FUNDO		DFS		POD		n = 1 (4.3%)
															FUNDO		DFS		DNE		n = 1 (4.3%)
															FUNDO		DNE		DIET		n = 2 (8.7%)
											Single ND Services [8]
									Single ND service only
												DBC
												DBC Nurse/Allied Health Staff
											DFS	n = 13 (12.3%)
											POD	n = 54 (50.9%)
											DNE	n= 23 (21.7%)
											FUNDO	n = 3 (2.8%)
											DIET	n= 13 (12.3)
											Multiple Services [9]
									Multiple ND services only
													DBC
													DBC Nurse/Allied Health Staff
											DNE	DIET	n = 4 (100%)
																																			Version 2 Edited 10/03/2011 - Choi Lok Man, Service Operations
		Legend
						in mins: median (min, max)
		In-process wait
		Process Time
				Between process wait		Queue
			Value-added Step			Wait time
			Non value-added Step			Rework
			Department			Chaos
			Personnel			Kaizen lightning burst
